# Supplementary material
Source: Springer Nature journal article supplement (https://www.springermedizin.de/resource/supplementary/12874_2009_356_MOESM2_ESM.pdf/9434300)
Supplement: MOESM2 [file 9434300]

Practices identified in the chosen regions in Republic of Ireland and Northern Ireland  
 $n = 845$

Practices requiring contact re eligibility  
 $n = 210$

Confirmed eligible  
 $n = 266$

Excluded  
 $n = 579$

Number of practices invited to participate  
 $n = 165$

Practices willing to Participate  
 $n = 56$

Practices unwilling to participate  
 $n=109$

Workload/Current time commitments ( $n=50$ )

Staff Issues ( $n=19$ )

Not interested in SPHERE/Research in general ( $n=9$ )

Other reason/ No reason given ( $n=31$ )

Total practices recruited  
 $n = 48$

Practices unable to proceed  
 $n = 8$

Insufficient number of eligible patients ( $n=5$ )

Staff Issues ( $n=2$ )

Building renovations ( $n=1$ )
